# Supplementary material for: Catalytic deoxygenation during cellulose fast pyrolysis using acid–base bifunctional catalysis
Source: Royal Society of Chemistry journal article supplement (doi:10.1039/c6cy01307d), 2016-01-01
Supplement: c6cy01307d1.pdf [file c6cy01307d1.pdf]

*Electronic Supplementary Information for*

**Catalytic deoxygenation during cellulose fast pyrolysis using acid-base bifunctional catalysis**

Jing Zhang, Yong S. Choi and Brent H. Shanks\*

**Product analysis**

The conditions for the online product analysis were: a) temperature of GC injector set at 300 °C; b) temperature ramp consisting of an initial hold at 35 °C for 3 minutes, then ramping to 300 °C at a rate of 5 °C/min followed by a hold at 300 °C for 4 minutes; and c) constant column flow rate of 1 ml/min. The flow rate through the reactor was controlled by the split ratio. A capillary column of ZB 1701 (60 m × 0.250 mm and 0.250 μm film thickness) was used to separate the condensable products. For simultaneous identification and quantification, two identical ZB 1701 columns were used. One was connected to a MS (5975C, Agilent Technologies, USA) for product identification and the other one was connected to an FID for product quantification. The calibration method for the condensable vapor products was described in a previous publications.<sup>1</sup> A Porous Layer Open Tubular (PLOT) column (60 m x 0.320 mm) (GS-GasPro, Agilent, USA) was used to separate non-condensable gas (NCG) products, which were then quantified by TCD. The NCG products in the current study include CO, CO<sub>2</sub>, C<sub>2</sub>H<sub>4</sub> and C<sub>3</sub>H<sub>6</sub>. A standard gas mixture (Praxair, USA) consisting of CO, CO<sub>2</sub>, CH<sub>4</sub>, C<sub>2</sub>H<sub>4</sub>, C<sub>2</sub>H<sub>6</sub>, C<sub>3</sub>H<sub>6</sub>, C<sub>3</sub>H<sub>8</sub>, and C<sub>4</sub>H<sub>8</sub> was used for the calibration.

**Deoxygenation over serpentine with different loadings**

Table S1 shows the product distribution from cellulose catalytic pyrolysis over serpentine 1M at different loadings. Significant deoxygenation did not occur unless a minimum catalyst to cellulose loading of 2.52:1 was used. Among the cases examined, the highest yield of condensed vapor products was observed at a loading of 3.86:1.

Table S1. Product distribution from cellulose fast pyrolysis over serpentine 1M at different loadings.

| Products <sup>a</sup>                                        | Serpentine 1M <sup>b</sup> | Serpentine 1M <sup>c</sup> | Serpentine 1M <sup>d</sup> | Serpentine 1M <sup>e</sup> |
|--------------------------------------------------------------|----------------------------|----------------------------|----------------------------|----------------------------|
| Formaldehyde                                                 | 0.42                       | 0.62                       | 0.85                       | 1.17                       |
| Acetaldehyde                                                 | 2.96                       | 5.38                       | 7.08                       | 8.22                       |
| Furan                                                        | 0.65                       | 1.01                       | 1.34                       | 1.66                       |
| Propenal                                                     | 0.61                       | 0.88                       | 1.14                       | 1.22                       |
| Acetone                                                      | 0.37                       | 0.75                       | 1.03                       | 1.50                       |
| Methylglyoxal                                                | 2.79                       | 1.91                       | 1.69                       | 1.04                       |
| 2-methyl furan                                               | 0.35                       | 0.64                       | 0.86                       | 0.97                       |
| Methyl vinyl ketone                                          | 2.41                       | 3.19                       | 4.45                       | 4.16                       |
| Glycolaldehyde                                               | 4.69                       | 0.99                       | 1.25                       | 1.12                       |
| Acetic acid                                                  | 0.27                       | 0.95                       | 0.93                       | 0.34                       |
| Acetol                                                       | 0.85                       | 0.74                       | 0.59                       | 0.68                       |
| Furfural                                                     | 2.90                       | 3.87                       | 4.85                       | 3.27                       |
| 2 furanmethanol                                              | 0.48                       | 0.85                       | 0.51                       | 0.27                       |
| 3 furanmethanol                                              | 0.19                       | 0.93                       | 0.98                       | 1.18                       |
| 2-hydroxy cyclopent-2-en-1-one                               | 1.01                       | 0.96                       | 0.77                       | 0.33                       |
| 5-methyl furfural                                            | 1.73                       | 2.77                       | 3.22                       | 2.06                       |
| 2(5H) furanone                                               | 0.27                       | 0.39                       | 0.39                       | 0.29                       |
| MW 114 DAXP 2                                                | 0.52                       | 0.00                       | 0.06                       | 0.40                       |
| Methyl cyclopentenolone                                      | 0.31                       | 0.35                       | 0.29                       | 0.08                       |
| Other DAXP 2                                                 | 0.55                       | 0.38                       | 0.00                       | 0.06                       |
| Levogluconone                                                | 0.37                       | 0.30                       | 0.19                       | 0.27                       |
| Cyclic hydroxy lactone                                       | 4.04                       | 1.65                       | 1.19                       | 0.04                       |
| 1,4,3,6-dianhydro-α-d-glucopyranose                          | 0.47                       | 0.14                       | 0.15                       | 0.01                       |
| 5-hydroxy methyl furfural                                    | 1.12                       | 0.21                       | 0.06                       | 0.04                       |
| Dianhydro glucopyranose                                      | 0.52                       | 0.16                       | 0.16                       | 0.10                       |
| Other AXP                                                    | 0.09                       | 0.05                       | 0.06                       | 0.07                       |
| Levogluconan                                                 | 6.62                       | 0.14                       | 0.10                       | 0.07                       |
| Levogluconan-furanose                                        | 0.46                       | 0.04                       | 0.00                       | 0.02                       |
| MW 86 <sup>f</sup>                                           | 1.36                       | 0.80                       | 0.80                       | 0.32                       |
| C <sub>6</sub> H <sub>8</sub> O <sub>4</sub> _1 <sup>f</sup> | 0.10                       | 0.00                       | 0.00                       | 0.25                       |
| C <sub>6</sub> H <sub>8</sub> O <sub>4</sub> _2 <sup>f</sup> | 0.00                       | 0.05                       | 0.09                       | 0.06                       |
| C <sub>6</sub> H <sub>8</sub> O <sub>4</sub> _3 <sup>f</sup> | 0.17                       | 0.12                       | 0.09                       | 0.18                       |

|                                                            |       |       |       |       |
|------------------------------------------------------------|-------|-------|-------|-------|
| C <sub>4</sub> H <sub>6</sub> O <sub>2</sub> <sup>f</sup>  | 0.28  | 0.27  | 0.26  | 0.24  |
| C <sub>6</sub> H <sub>6</sub> O <sup>f</sup>               | 0.18  | 0.21  | 0.23  | 0.21  |
| C <sub>6</sub> H <sub>6</sub> O <sub>2</sub> <sup>f</sup>  | 0.18  | 0.32  | 0.19  | 0.17  |
| C <sub>5</sub> H <sub>4</sub> O <sub>2</sub> <sup>f</sup>  | 0.35  | 0.64  | 0.74  | 0.67  |
| C <sub>6</sub> H <sub>10</sub> O <sup>f</sup>              | 0.12  | 0.22  | 0.23  | 0.21  |
| C <sub>6</sub> H <sub>6</sub> O <sub>2</sub> <sup>f</sup>  | 0.42  | 0.68  | 0.67  | 0.60  |
| C <sub>5</sub> H <sub>4</sub> O <sub>2</sub> <sup>f</sup>  | 0.08  | 0.34  | 0.33  | 0.30  |
| C <sub>5</sub> H <sub>4</sub> O <sub>2</sub> <sup>f</sup>  | 0.16  | 0.39  | 0.32  | 0.29  |
| C <sub>5</sub> H <sub>6</sub> O <sub>2</sub> <sup>f</sup>  | 0.08  | 0.10  | 0.13  | 0.12  |
| C <sub>6</sub> H <sub>6</sub> O <sub>2</sub> <sup>f</sup>  | 0.00  | 0.19  | 0.21  | 0.18  |
| C <sub>6</sub> H <sub>6</sub> O <sup>f</sup>               | 0.00  | 0.50  | 0.57  | 0.51  |
| C <sub>6</sub> H <sub>4</sub> O <sub>3</sub> <sup>f</sup>  | 0.05  | 0.07  | 0.09  | 0.08  |
| C <sub>5</sub> H <sub>6</sub> O <sub>2</sub> <sup>f</sup>  | 0.19  | 0.62  | 0.55  | 0.50  |
| C <sub>10</sub> H <sub>6</sub> O <sub>2</sub> <sup>f</sup> | 0.00  | 0.00  | 0.04  | 0.04  |
| Ethylene                                                   | 0.11  | 0.19  | 0.30  | 0.38  |
| Propene                                                    | 0.24  | 0.42  | 0.57  | 0.72  |
| CO                                                         | 4.18  | 7.18  | 6.24  | 7.64  |
| CO <sub>2</sub>                                            | 7.41  | 10.06 | 10.59 | 11.04 |
| Char+coke                                                  | 31.24 | 42.96 | 39.05 | 41.17 |
| Overall vapor products <sup>g</sup>                        | 42.11 | 36.40 | 40.63 | 36.65 |
| Summation                                                  | 84.95 | 96.60 | 96.51 | 96.51 |
| Oxygen content of vapor products                           | 41.87 | 35.76 | 35.01 | 34.16 |
| H/C <sub>eff</sub>                                         | 0.24  | 0.44  | 0.50  | 0.60  |
| HHV                                                        | 18.98 | 22.53 | 23.16 | 23.83 |

a. all yields are in terms of carbon; b. catalyst loading: 1.12:1; c. catalyst loading: 2.52:1; d. catalyst loading: 3.86:1; e. catalyst loading: 5.08:1; f. molecular weight determined by MS; and g. CO, CO<sub>2</sub> and water not included.

### Deoxygenation over different acid, base, acid-base bi-functional materials

Table S2. Product distribution from cellulose fast pyrolysis over acid and base materials with the same total acid and/or total base amount.

| Products <sup>a</sup>                                        | Serpentine 1M <sup>b</sup> | Silica-alumina <sup>c</sup> | Strong acid <sup>d</sup> | HA MgO <sup>e</sup> | HA CaO <sup>f</sup> | Strong acid/HA MgO <sup>g</sup> |
|--------------------------------------------------------------|----------------------------|-----------------------------|--------------------------|---------------------|---------------------|---------------------------------|
| Formaldehyde                                                 | 0.85                       | 0.20                        | 0.42                     | 0.27                | 0.76                | 0.54                            |
| Methanol                                                     | -                          | -                           | -                        | -                   | 0.51                | 0.85                            |
| Acetaldehyde                                                 | 7.08                       | 2.11                        | 1.27                     | 2.49                | 2.34                | 4.58                            |
| Furan                                                        | 1.34                       | 0.88                        | 0.59                     | 0.17                | 0.26                | 0.51                            |
| Propenal                                                     | 1.14                       | 0.45                        | 0.30                     | 0.63                | 0.38                | 0.68                            |
| Acetone                                                      | 1.03                       | 0.20                        | 0.20                     | 0.31                | 0.33                | 0.63                            |
| Methylglyoxal                                                | 1.69                       | 1.50                        | 0.65                     | 2.02                | 1.80                | 2.50                            |
| 2-methyl furan                                               | 0.86                       | 0.41                        | 0.20                     | 0.13                | 0.11                | 0.29                            |
| Methyl vinyl ketone                                          | 4.45                       | 1.17                        | 0.84                     | 1.42                | 1.60                | 3.64                            |
| Glycolaldehyde                                               | 1.25                       | 2.90                        | 1.47                     | 6.13                | 8.35                | 2.81                            |
| Acetic acid                                                  | 0.93                       | 0.49                        | 0.38                     | 0.27                | 0.43                | 0.51                            |
| Acetol                                                       | 0.59                       | 0.29                        | 0.17                     | 1.43                | 2.05                | 1.76                            |
| MW 86 <sup>h</sup>                                           | 0.80                       | 1.69                        | 2.39                     | 0.40                | 1.04                | 1.18                            |
| Furfural                                                     | 4.85                       | 2.80                        | 2.07                     | 0.95                | 0.81                | 2.16                            |
| 2 furanmethanol                                              | 0.51                       | 0.17                        | 0.41                     | 0.20                | 0.23                | 0.51                            |
| 3 furanmethanol                                              | 0.98                       | 0.12                        | 0.05                     | 0.13                | 0.26                | 0.32                            |
| 2-hydroxy cyclopent-2-en-1-one                               | 0.77                       | 0.51                        | 0.32                     | 0.87                | 1.32                | 1.40                            |
| 5-methyl furfural                                            | 3.22                       | 0.54                        | 0.07                     | 0.21                | 0.17                | 1.01                            |
| 2(5H) furanone                                               | 0.39                       | 0.18                        | 0.06                     | 0.25                | 0.43                | 0.42                            |
| MW 114 DAXP 2                                                | 0.06                       | 0.30                        | 1.16                     | 0.06                | 0.11                | 0.20                            |
| Methyl Cyclopentenolone                                      | 0.29                       | 0.12                        | 0.11                     | 0.56                | 0.34                | 0.40                            |
| Other DAXP 2                                                 | 0.00                       | 0.08                        | 0.42                     | 0.06                | 0.18                | 0.20                            |
| Levogluconone                                                | 0.19                       | 0.54                        | 17.46                    | 0.14                | 0.12                | 0.35                            |
| Cyclic hydroxy lactone                                       | 1.19                       | 1.73                        | 1.93                     | 2.15                | 2.04                | 3.92                            |
| C <sub>6</sub> H <sub>8</sub> O <sub>4</sub> _1 <sup>h</sup> | 0.00                       | 0.00                        | 0.07                     | 0.00                | 0.24                | 0.12                            |
| C <sub>6</sub> H <sub>8</sub> O <sub>4</sub> _2 <sup>h</sup> | 0.09                       | 0.00                        | 0.19                     | 0.34                | 0.43                | 0.38                            |
| C <sub>6</sub> H <sub>8</sub> O <sub>4</sub> _3 <sup>h</sup> | 0.09                       | 0.00                        | 0.34                     | 0.58                | 0.54                | 0.34                            |
| 1,4,3,6-dianhydro-a-d-                                       | 0.15                       | 0.23                        | 2.93                     | 0.28                | 0.32                | 0.45                            |

|                                                            |       |       |       |       |       |       |
|------------------------------------------------------------|-------|-------|-------|-------|-------|-------|
| glucopyranose                                              |       |       |       |       |       |       |
| 5-hydroxy methyl furfural                                  | 0.06  | 0.19  | 0.61  | 0.75  | 0.92  | 1.19  |
| Dianhydro glucopyranose                                    | 0.16  | 0.30  | 2.27  | 0.05  | 0.15  | 0.07  |
| Other AXP                                                  | 0.06  | 0.41  | 0.35  | 0.49  | 0.18  | 0.08  |
| Levoglucofan                                               | 0.10  | 2.25  | 5.81  | 23.09 | 18.04 | 3.01  |
| Levoglucofan-furanose                                      | 0.00  | 0.31  | 0.30  | 1.04  | 0.57  | 0.04  |
| C <sub>4</sub> H <sub>6</sub> O <sub>2</sub> <sup>h</sup>  | 0.26  | -     | -     | -     | -     | -     |
| C <sub>6</sub> H <sub>6</sub> O <sup>h</sup>               | 0.23  | -     | -     | -     | -     | -     |
| C <sub>6</sub> H <sub>6</sub> O <sub>2</sub> <sup>h</sup>  | 0.19  | -     | -     | -     | -     | -     |
| C <sub>5</sub> H <sub>4</sub> O <sub>2</sub> <sup>h</sup>  | 0.74  | -     | -     | -     | -     | -     |
| C <sub>6</sub> H <sub>10</sub> O <sup>h</sup>              | 0.23  | -     | -     | -     | -     | -     |
| C <sub>6</sub> H <sub>6</sub> O <sub>2</sub> <sup>h</sup>  | 0.67  | -     | -     | -     | -     | -     |
| C <sub>5</sub> H <sub>4</sub> O <sub>2</sub> <sup>h</sup>  | 0.33  | -     | -     | -     | -     | -     |
| C <sub>5</sub> H <sub>4</sub> O <sub>2</sub> <sup>h</sup>  | 0.32  | -     | -     | -     | -     | -     |
| C <sub>5</sub> H <sub>6</sub> O <sub>2</sub> <sup>h</sup>  | 0.13  | -     | -     | -     | -     | -     |
| C <sub>6</sub> H <sub>6</sub> O <sub>2</sub> <sup>h</sup>  | 0.21  | -     | -     | -     | -     | -     |
| C <sub>6</sub> H <sub>6</sub> O <sup>h</sup>               | 0.57  | -     | -     | -     | -     | -     |
| C <sub>6</sub> H <sub>4</sub> O <sub>3</sub> <sup>h</sup>  | 0.09  | -     | -     | -     | -     | -     |
| C <sub>5</sub> H <sub>6</sub> O <sub>2</sub> <sup>h</sup>  | 0.55  | -     | -     | -     | -     | -     |
| C <sub>10</sub> H <sub>6</sub> O <sub>2</sub> <sup>h</sup> | 0.04  | -     | -     | -     | -     | -     |
| Ethylene                                                   | 0.30  | 0.12  | 0.14  | 0.18  | 0.15  | 0.29  |
| Propene                                                    | 0.57  | 0.16  | 0.12  | 0.00  | 0.17  | 0.37  |
| CO                                                         | 6.24  | 4.79  | 3.63  | 2.85  | 1.52  | 4.25  |
| CO <sub>2</sub>                                            | 10.59 | 4.96  | 5.78  | 5.82  | 1.74  | 10.25 |
| Char+coke                                                  | 39.03 | 36.61 | 24.63 | 25.44 | 34.08 | 32.00 |
| Overall vapor products <sup>g</sup>                        | 40.63 | 23.33 | 46.07 | 50.81 | 47.67 | 37.69 |
| Summation                                                  | 96.50 | 69.70 | 80.12 | 82.17 | 85.01 | 84.19 |
| Oxygen content of vapor products                           | 35.01 | 41.59 | 41.40 | 46.64 | 46.28 | 40.07 |
| H/C <sub>eff</sub>                                         | 0.50  | 0.23  | 0.08  | 0.15  | 0.19  | 0.42  |
| HHV                                                        | 23.16 | 19.13 | 18.53 | 16.71 | 16.95 | 20.53 |

a. all yields are in terms of carbon; b. catalyst loading: 3.86:1; c. catalyst loading: 0.93:1; d. catalyst loading: 2.07:1; e. catalyst loading: 1.26:1; f. catalyst loading: 1.03:1; g. catalyst loading: 2.07/1.26:1; h. molecular weight determined by MS; and g CO, CO<sub>2</sub> and water not included

### Deoxygenation over transitional metal materials

Table S3. Product distribution from cellulose fast pyrolysis over transitional metal materials

| Products <sup>a</sup>                          | MoO <sub>3</sub> <sup>b</sup> | FeSO <sub>4</sub> ·7H <sub>2</sub> O <sup>c</sup> | Fe <sub>2</sub> O <sub>3</sub> <sup>d</sup> |
|------------------------------------------------|-------------------------------|---------------------------------------------------|---------------------------------------------|
| Formaldehyde                                   | 0.29                          | 0.29                                              | 0.30                                        |
| Acetaldehyde                                   | 1.46                          | 1.13                                              | 3.51                                        |
| Furan                                          | 0.90                          | 0.51                                              | 0.25                                        |
| Propenal                                       | 0.50                          | 0.29                                              | 0.55                                        |
| Acetone                                        | 0.66                          | 0.23                                              | 0.57                                        |
| Methylglyoxal                                  | 0.64                          | 0.57                                              | 1.49                                        |
| 2-methyl furan                                 | 0.10                          | 0.21                                              | 0.17                                        |
| Methyl vinyl ketone                            | 0.83                          | 1.14                                              | 2.44                                        |
| Glycolaldehyde                                 | 4.99                          | 1.35                                              | 2.65                                        |
| Acetic acid                                    | 0.05                          | 0.31                                              | 2.04                                        |
| Acetol                                         | 0.21                          | 0.20                                              | 1.35                                        |
| MW 86                                          | 1.26                          | 1.29                                              | 0.46                                        |
| Furfural                                       | 1.30                          | 2.86                                              | 0.96                                        |
| 2 furanmethanol                                | 0.51                          | 0.43                                              | 0.30                                        |
| 3 furanmethanol                                | 0.16                          | 0.09                                              | 0.47                                        |
| 2-hydroxy cyclopent-2-en-1-one                 | 0.09                          | 0.30                                              | 1.40                                        |
| 5-methyl furfural                              | 0.48                          | 0.80                                              | 0.54                                        |
| 2(5H) furanone                                 | 0.21                          | 0.18                                              | 0.38                                        |
| MW 114 DAXP 2                                  | 0.39                          | 0.83                                              | 0.05                                        |
| Methyl cyclopentenolone                        | 0.39                          | 0.10                                              | 0.58                                        |
| Other DAXP 2                                   | 0.20                          | 0.47                                              | 0.20                                        |
| Levoglucofanone                                | 2.09                          | 12.75                                             | 0.32                                        |
| Cyclic hydroxy lactone                         | 1.52                          | 1.65                                              | 1.54                                        |
| C <sub>6</sub> H <sub>8</sub> O <sub>4</sub> 1 | 0.18                          | 0.02                                              | 0.15                                        |

|                                                 |       |       |       |
|-------------------------------------------------|-------|-------|-------|
| C <sub>6</sub> H <sub>8</sub> O <sub>4</sub> _2 | 0.31  | 0.25  | 0.16  |
| C <sub>6</sub> H <sub>8</sub> O <sub>4</sub> _3 | 0.44  | 0.53  | 0.13  |
| 1,4,3,6-dianhydro- $\alpha$ -d-glucopyranose    | 1.70  | 2.15  | 0.39  |
| 5-hydroxy methyl furfural                       | 0.34  | 0.20  | 1.00  |
| Dianhydro glucopyranose                         | 1.46  | 1.61  | 0.01  |
| Other AXP                                       | 0.26  | 0.57  | 0.03  |
| Levogluconan                                    | 15.18 | 11.28 | 7.97  |
| Levogluconan-furanose                           | 0.25  | 0.68  | 0.24  |
| Overall vapor products                          | 39.53 | 45.28 | 32.58 |
| Oxygen content of vapor products <sup>e</sup>   | 45.46 | 42.67 | 43.27 |
| H/C <sub>eff</sub>                              | 0.13  | 0.08  | 0.29  |
| HHV                                             | 17.05 | 17.96 | 18.68 |

a. all yields are in terms of carbon; b. catalyst loading: 4.45:1; c. catalyst loading: 3.66:1; d. catalyst loading: 3.87:1; e. CO, CO<sub>2</sub> and water not included.

It was reported that MoO<sub>3</sub> was active in atmospheric hydrodeoxygenation of cellulose or lignin pyrolysis derived oxygenates with unsaturated hydrocarbons formed during hydrodeoxygenation.<sup>2</sup> In the current study, MoO<sub>3</sub> was used as catalyst for cellulose fast pyrolysis. However, the results showed only a small amount of deoxygenation and a sacrifice of about half of the vapor products, which suggested the presence of hydrogen was necessary for MoO<sub>3</sub> to be effective in the oxygen removal. Iron in acid treated olivine, which might be in oxide or sulfate form, was proposed to be active sites for deoxygenation during biomass fast pyrolysis.<sup>3</sup> In the current study, both Fe<sub>2</sub>O<sub>3</sub> and FeSO<sub>4</sub> were tested for catalytic deoxygenation. As shown in Table S3, the Fe<sub>2</sub>O<sub>3</sub> and FeSO<sub>4</sub> behaved similar as single base or single acid materials, respectively. Their deoxygenation performance was not as promising as the acid-base bifunctional catalyst.

## References

- 1 J. Zhang, M. W. Nolte and B. H. Shanks, *ACS Sustainable Chem. Eng.*, 2014, **2**, 2820-2830.
- 2 T. Prasomsri, T. Nimmanwudipong and Y. Roman-Leshkov, *Energy Environ. Sci.*, 2013, **6**, 1732-1738.
- 3 A. Sanna and J. M. Andresen, *ChemSusChem*, 2012, **5**, 1944-1957.
